# Supplementary material for: Registry-based cohort study of alpha-1 antitrypsin deficiency prevalence, incidence and mortality in Denmark 2000–2018
Source: PubMed Central journal article supplement — BMJ Open Respir Res. 2022 Dec 22;9(1):e001281. doi: 10.1136/bmjresp-2022-001281 (PMC9791442; doi:10.1136/bmjresp-2022-001281), 2022-12-22
Supplement: bmjresp-2022-001281supp001.pdf [file bmjresp-2022-001281supp001.pdf]

## A Registry-based Cohort Study of Alpha-1 Antitrypsin Deficiency Prevalence, Incidence, and Mortality in Denmark 2000-2018

### Appendix

John Acquavella<sup>1</sup> PhD, Emese Vágó<sup>1</sup> PhD, Henrik Toft Sørensen<sup>1</sup> MD PhD DMSc DSc, Erzsébet Horváth-Puhó<sup>1</sup> PhD, Gregory P Hess<sup>1,2</sup> MD MSc

#### Affiliations

<sup>1</sup> Department of Clinical Epidemiology, Aarhus University Hospital and Department of Clinical Medicine, Aarhus University, Olof Palmes Allé 43-45, 8200 Aarhus N, Denmark

<sup>2</sup> Jefferson College of Population Health, Thomas Jefferson University, Philadelphia, PA, United States

**APPENDIX – SUPPLEMENTARY TABLES 1 - 3 AVAILABLE ONLINE  
ONLY**

**Supplementary Table 1. Characteristics of patients with AATD diagnosed during the period 1/1/2000 through 12/31/2018, classified by ICD-10 diagnosis codes**

| <b>ICD-10 Diagnosis Description</b>          | <b>ICD-10 Code</b> |
|----------------------------------------------|--------------------|
| <b>Lung diseases</b>                         | <b>J40-J47</b>     |
| Bronchitis                                   | J41                |
| Emphysema                                    | J43                |
| Other chronic obstructive pulmonary disease  | J 44               |
| Asthma                                       | J45                |
| Bronchiectasis                               | J47                |
| All other chronic lower respiratory diseases | J46                |
| Liver disease                                | K70 – K76          |

Abbreviation: ICD= *International Classification of Diseases*

**Supplementary Table 2. Conditions included in the Charlson Comorbidity Index, according to ICD-8 and ICD-10 Codes**

| Charlson Condition                           | ICD-8 Code                                                     | ICD-10 Code                                                              |
|----------------------------------------------|----------------------------------------------------------------|--------------------------------------------------------------------------|
| Myocardial infarction                        | 410                                                            | I21, I22, I23                                                            |
| Congestive heart failure                     | 427.09–427.11, 427.19, 428.99, 782.49                          | I50, I11.0, I13.0, I13.2                                                 |
| Peripheral vascular disease                  | 440-445                                                        | I70, I71, I72, I73, I74, I77                                             |
| Cerebrovascular disease                      | 430-438                                                        | I60-I69, G45, G46                                                        |
| Dementia                                     | 290.09–290.19, 293.09                                          | F00-F03, F05.1, G30                                                      |
| Chronic pulmonary disease                    | 490–493, 515–518                                               | J40-J47, J60-J67, J68.4, J70.1, J70.3, J84.1, J92.0, J96.1, J98.2, J98.3 |
| Connective tissue disease                    | 135.99, 446, 712, 716, 734                                     | M05, M06, M08, M09, M30, M31, M32, M33, M34, M35, M36, D86               |
| Ulcer disease                                | 530.91, 530.98, 531–534                                        | K22.1, K25-K28                                                           |
| Mild liver disease                           | 571, 573.01, 573.04                                            | B18, K70.0-K70.3, K70.9, K71, K73, K74, K76.0                            |
| Diabetes mellitus                            | 249.00, 249.06, 249.07, 249.09, 250.00, 250.06, 250.07, 250.09 | E10.0, E10.1, E10.9, E11.0; E11.1; E11.9                                 |
| Diabetes mellitus with chronic complications | 249.01-249.06, 249.08, 250.01-250.05, 250.08                   | E10.2-E10.8, E11.2-E11.8                                                 |
| Hemiplegia                                   | 344                                                            | G81, G82                                                                 |
| Moderate/severe renal disease                | 403, 404, 580–584, 590.09, 593.19, 753.10–753.19, 792          | I12, I13, N00-N05, N07, N11, N14, N17-N19, Q61                           |
| Any tumor                                    | 140-194                                                        | C00-C75                                                                  |
| Leukemia                                     | 204-207                                                        | C91-C95                                                                  |
| Lymphoma                                     | 200-203, 275.59                                                | C81-C85, C88, C90, C96                                                   |
| Moderate/severe liver disease                | 070.00, 070.02, 070.04, 070.06, 070.08, 573.00, 456.00–456.09  | B15.0, B16.0, B16.2, B19.0, K70.4, K72, K76.6, I85                       |
| Metastatic solid tumor                       | 195-199                                                        | C76-C80                                                                  |
| AIDS                                         | 079.83                                                         | B21-B24                                                                  |
